# Supplementary material for: Acidity and availability of aluminum, iron and manganese as factors affecting germination in European acidic dry and alkaline xerothermic grasslands
Source: PeerJ. 2022 Apr 28;10:e13255. doi: 10.7717/peerj.13255 (PMC9057293; doi:10.7717/peerj.13255)
Supplement: Supplemental Information 7 — The raw data were used for all statistical analyses. [file peerj-10-13255-s007.xlsx]

## Sheet: D1. pH
	Dataset 1. Raw data from Experiment 1 (Effects of pH on ability of seeds to complete germination). The abbreviations for the studied species follows the article (see Table 1 for details).
	Species	Acidity [pH value]	FGP [%]	IGV [a.u.]
	Amo	5	96	86.1
		5	100	89.9
		5	100	90.67
		5	96	86.1
		6	92	77.52
		6	96	80.95
		6	96	81.33
		6	88	74.86
		7	32	23.24
		7	36	25.71
		7	32	23.05
		7	36	25.71
		8	0	0
		8	0	0
		8	0	0
		8	0	0
	Aam	5	72	21.9
		5	76	20.95
		5	72	21.33
		5	64	20.19
		6	64	20.76
		6	60	19.24
		6	64	19.43
		6	68	21.33
		7	60	15.81
		7	56	14.48
		7	56	13.52
		7	64	16.57
		8	4	0.76
		8	0	0
		8	0	0
		8	4	0.76
	Bof	5	24	12.38
		5	16	9.9
		5	28	15.62
		5	20	11.81
		6	44	23.05
		6	52	28
		6	48	25.71
		6	44	25.91
		7	44	22.29
		7	40	21.14
		7	44	24.57
		7	36	20.95
		8	0	0
		8	0	0
		8	0	0
		8	0	0
	Csc	5	36	32.76
		5	28	25.14
		5	40	36.76
		5	32	27.62
		6	40	36.19
		6	44	39.43
		6	32	28.76
		6	32	28
		7	68	60.76
		7	64	56.38
		7	68	60.95
		7	56	48.38
		8	44	40
		8	32	27.05
		8	40	36
		8	40	36.19
	Cst	5	96	90.1
		5	92	87.05
		5	100	93.71
		5	96	90.1
		6	92	87.43
		6	100	94.29
		6	96	90.86
		6	96	91.05
		7	92	87.24
		7	96	90.86
		7	100	93.52
		7	92	86.48
		8	88	83.43
		8	80	76
		8	96	90.48
		8	92	87.05
	Dca	5	92	85.71
		5	88	81.9
		5	96	89.71
		5	88	81.9
		6	80	73.71
		6	76	69.52
		6	80	73.52
		6	72	66.48
		7	68	61.9
		7	60	53.9
		7	72	65.52
		7	72	63.62
		8	48	40
		8	44	34.48
		8	44	35.05
		8	48	39.05
	Dde	5	44	40.57
		5	52	48
		5	48	43.43
		5	52	46.29
		6	48	43.81
		6	52	47.05
		6	48	40.95
		6	52	46.86
		7	44	38.67
		7	44	40.19
		7	40	35.81
		7	48	41.53
		8	44	36.95
		8	48	40.19
		8	36	31.05
		8	44	38.1
	Evu	5	16	14.48
		5	20	17.71
		5	16	14.67
		5	16	14.29
		6	20	16.76
		6	24	19.43
		6	20	18.1
		6	16	14.86
		7	28	24.95
		7	32	29.14
		7	32	27.43
		7	28	23.62
		8	16	14.48
		8	12	10.67
		8	16	13.71
		8	16	14.29
	Gcr	5	20	5.52
		5	24	6.86
		5	24	7.43
		5	12	4.38
		6	52	9.14
		6	56	6.29
		6	64	9.9
		6	56	9.14
		7	32	15.62
		7	20	17.14
		7	28	18.67
		7	28	16.76
		8	20	4.95
		8	24	6.86
		8	28	7.24
		8	24	6.48
	Hpi	5	88	78.29
		5	84	72.38
		5	88	77.71
		5	92	77.33
		6	84	74.29
		6	76	67.43
		6	88	73.14
		6	84	74.67
		7	68	56.76
		7	56	48.19
		7	60	49.33
		7	64	52.57
		8	12	8.19
		8	4	2.67
		8	8	5.52
		8	8	5.33
	Hpe	5	44	29.9
		5	48	32.95
		5	48	32.19
		5	44	29.33
		6	60	39.81
		6	68	46.1
		6	64	43.62
		6	56	37.71
		7	28	18.1
		7	32	20.95
		7	32	20.38
		7	20	13.71
		8	12	8.19
		8	12	7.62
		8	8	4.95
		8	20	12.19
	Hra	5	36	33.14
		5	32	29.71
		5	40	36.19
		5	40	37.14
		6	60	54.67
		6	68	61.14
		6	72	56.57
		6	52	46.48
		7	44	40.38
		7	40	35.05
		7	48	43.43
		7	44	40.57
		8	24	19.81
		8	28	22.48
		8	16	12.76
		8	24	20.19
	Pme	5	44	34.29
		5	48	35.81
		5	40	30.86
		5	52	39.05
		6	56	44.95
		6	60	48.38
		6	64	46.67
		6	52	40.76
		7	24	19.81
		7	16	12.38
		7	24	18.86
		7	28	22.86
		8	4	2.67
		8	0	0
		8	4	2.1
		8	0	0
	Pre	5	76	62.86
		5	68	56.19
		5	80	64.95
		5	80	65.9
		6	84	69.52
		6	92	77.71
		6	84	69.33
		6	88	73.52
		7	80	62.48
		7	72	55.43
		7	84	65.71
		7	80	61.14
		8	16	12
		8	8	5.33
		8	12	8.19
		8	20	14.86
	Pgr	5	72	57.14
		5	80	63.62
		5	76	59.24
		5	68	52.95
		6	84	68.95
		6	84	69.52
		6	96	76.19
		6	80	66.48
		7	76	56.95
		7	76	58.29
		7	72	54.67
		7	68	51.05
		8	8	5.71
		8	4	2.86
		8	8	4.95
		8	0	0
	Rac	5	52	40.95
		5	60	49.33
		5	56	45.33
		5	52	41.52
		6	52	40.76
		6	48	39.05
		6	52	45.33
		6	44	39.43
		7	48	39.62
		7	52	41.52
		7	48	39.81
		7	44	38.86
		8	40	33.33
		8	40	32
		8	36	30.1
		8	44	37.14
	Sge	5	24	20.57
		5	20	16.76
		5	16	13.52
		5	24	20.76
		6	68	57.52
		6	72	61.71
		6	64	53.33
		6	76	61.9
		7	48	41.52
		7	40	34.86
		7	48	42.1
		7	52	44.57
		8	44	36.95
		8	44	36.38
		8	48	40.57
		8	40	32.95
	Tse	5	40	31.43
		5	52	40.76
		5	44	34.1
		5	40	32.19
		6	32	27.43
		6	36	29.71
		6	28	23.62
		6	32	26.67
		7	12	9.14
		7	8	5.9
		7	16	12.57
		7	16	12.38
		8	8	6.29
		8	0	0
		8	8	5.9
		8	8	6.48
	Vth	5	76	64.19
		5	72	60.38
		5	72	59.43
		5	80	65.33
		6	88	72.95
		6	84	70.1
		6	80	66.48
		6	80	66.29
		7	84	68.95
		7	92	75.81
		7	88	73.14
		7	92	75.62
		8	44	34.1
		8	36	27.43
		8	48	36.38
		8	40	30.48
	Vte	5	36	25.9
		5	36	25.14
		5	32	23.05
		5	28	20
		6	64	40.38
		6	68	43.81
		6	72	45.9
		6	64	40.76
		7	28	19.24
		7	32	21.33
		7	28	18.67
		7	24	16.76
		8	16	8.95
		8	12	6.1
		8	8	4.19
		8	12	7.05

## Sheet: D2. Iron
	Dataset 2. Raw data from Experiment 2 (Effects of iron on ability of seeds to complete germination). The abbreviations for the studied species follows the article (see Table 1 for details).
	Species	Fe-containing compound	Concentration [µmol · dm¯³]	FGP [%]	IGV [a.u.]
	Amo	dH₂O (null)	0	48	42.67
			0	56	50.1
			0	52	45.71
			0	44	39.24
		Fe-HBED	5	68	62.29
			5	64	58.86
			5	60	55.24
			5	68	62.1
			25	44	41.33
			25	48	44.57
			25	44	40.95
			25	40	37.33
		FeCl₃	5	88	78.1
			5	84	75.24
			5	80	72.19
			5	80	71.81
			25	92	82.1
			25	88	78.1
			25	84	76.95
			25	84	76.43
	Aam	dH₂O (null)	0	60	44.57
			0	64	47.62
			0	68	48.95
			0	68	50.29
		Fe-HBED	5	72	52.19
			5	64	46.48
			5	60	45.52
			5	68	49.52
			25	64	47.05
			25	60	44.57
			25	60	45.33
			25	56	40.76
		FeCl₃	5	64	43.81
			5	56	38.29
			5	60	39.62
			5	60	42.48
			25	52	37.71
			25	48	32.95
			25	44	31.81
			25	48	35.05
	Bof	dH₂O (null)	0	52	33.52
			0	56	36
			0	52	33.14
			0	48	31.05
		Fe-HBED	5	44	31.62
			5	56	37.9
			5	48	32
			5	52	36.19
			25	56	37.52
			25	52	34.86
			25	48	32.57
			25	60	40.57
		FeCl₃	5	56	36.67
			5	56	38.29
			5	44	30.67
			5	60	40.19
			25	64	45.71
			25	48	34.29
			25	56	40.76
			25	52	34.67
	Csc	dH₂O (null)	0	40	36.19
			0	44	40.19
			0	52	43.62
			0	40	35.62
		Fe-HBED	5	44	39.62
			5	48	42.29
			5	44	39.62
			5	40	34.48
			25	36	30.86
			25	36	31.43
			25	32	27.62
			25	40	34.86
		FeCl₃	5	40	36.95
			5	44	40.76
			5	36	32.76
			5	44	40.76
			25	36	32.57
			25	28	24.38
			25	36	32.38
			25	40	34.86
	Cst	dH₂O (null)	0	100	93.9
			0	100	93.9
			0	100	93.33
			0	100	93.71
		Fe-HBED	5	96	91.05
			5	100	94.1
			5	96	90.86
			5	100	94.1
			25	96	90.1
			25	100	95.05
			25	96	90.67
			25	100	94.1
		FeCl₃	5	96	89.52
			5	100	92.57
			5	100	92.38
			5	96	89.71
			25	96	87.81
			25	100	90.86
			25	96	88.76
			25	96	88.57
	Dca	dH₂O (null)	0	96	88.38
			0	100	92.38
			0	96	88.19
			0	100	92.76
		Fe-HBED	5	84	78.67
			5	88	81.9
			5	92	85.71
			5	88	80.19
			25	88	81.14
			25	84	77.33
			25	88	80.95
			25	80	75.05
		FeCl₃	5	92	84.19
			5	92	85.9
			5	96	88.76
			5	84	78.1
			25	88	81.33
			25	88	82.48
			25	80	74.1
			25	80	74.67
	Dde	dH₂O (null)	0	64	57.14
			0	72	63.24
			0	72	63.24
			0	64	55.81
		Fe-HBED	5	52	48
			5	40	36.57
			5	52	47.81
			5	48	41.9
			25	48	42.48
			25	40	36.57
			25	48	42.67
			25	44	38.48
		FeCl₃	5	72	64.57
			5	68	61.71
			5	64	57.14
			5	64	57.52
			25	36	32.38
			25	32	28.19
			25	32	28.38
			25	40	34.67
	Evu	dH₂O (null)	0	68	63.43
			0	72	67.05
			0	68	64
			0	64	59.43
		Fe-HBED	5	52	47.43
			5	56	50.1
			5	60	54.1
			5	52	46.86
			25	56	51.05
			25	48	43.81
			25	48	44
			25	56	50.1
		FeCl₃	5	68	63.62
			5	64	60
			5	68	64
			5	60	55.62
			25	64	58.48
			25	64	58.86
			25	56	51.05
			25	60	54.86
	Gcr	dH₂O (null)	0	88	31.43
			0	92	34.29
			0	92	31.05
			0	84	32.38
		Fe-HBED	5	88	30.1
			5	92	32.76
			5	92	33.52
			5	88	31.81
			25	92	30.48
			25	92	32.76
			25	88	29.71
			25	84	30.48
		FeCl₃	5	68	22.48
			5	72	23.81
			5	64	22.1
			5	72	24.76
			25	72	26.1
			25	76	27.43
			25	60	21.71
			25	68	24.57
	Hpi	dH₂O (null)	0	96	87.24
			0	100	90.29
			0	96	87.05
			0	100	91.05
		Fe-HBED	5	84	76
			5	76	69.71
			5	72	65.9
			5	80	73.52
			25	76	67.81
			25	72	65.14
			25	68	61.14
			25	76	67.05
		FeCl₃	5	88	77.71
			5	84	76
			5	80	71.81
			5	84	75.05
			25	88	76.38
			25	84	75.05
			25	76	67.24
			25	88	76.38
	Hpe	dH₂O (null)	0	72	39.62
			0	80	43.81
			0	68	38.67
			0	80	40.57
		Fe-HBED	5	80	46.48
			5	72	42.1
			5	76	42.86
			5	72	41.14
			25	52	30.86
			25	40	24.38
			25	44	28.95
			25	52	31.43
		FeCl₃	5	68	43.81
			5	56	38.67
			5	64	41.71
			5	68	41.33
			25	72	48.57
			25	56	39.43
			25	60	43.05
			25	64	43.81
	Hra	dH₂O (null)	0	56	49.33
			0	60	52.95
			0	64	54.29
			0	56	48.95
		Fe-HBED	5	36	28.76
			5	32	26.48
			5	28	21.33
			5	36	29.52
			25	24	17.71
			25	28	22.1
			25	20	15.43
			25	24	18.1
		FeCl₃	5	56	49.71
			5	52	45.33
			5	60	51.43
			5	48	42.29
			25	28	24.19
			25	32	26.1
			25	20	16.38
			25	20	16.57
	Pme	dH₂O (null)	0	72	62.1
			0	76	64.38
			0	68	58.1
			0	76	65.1
		Fe-HBED	5	64	55.43
			5	72	62.48
			5	64	55.05
			5	64	54.86
			25	56	48.57
			25	64	53.52
			25	48	41.33
			25	52	45.33
		FeCl₃	5	64	55.81
			5	76	64.91
			5	60	52
			5	64	54.1
			25	64	55.24
			25	60	50.86
			25	68	58.48
			25	68	56.19
	Pre	dH₂O (null)	0	80	70.1
			0	88	74.67
			0	80	68.76
			0	76	66.67
		Fe-HBED	5	68	59.43
			5	76	65.14
			5	68	57.52
			5	64	54.67
			25	72	63.43
			25	64	54.29
			25	60	53.52
			25	68	59.05
		FeCl₃	5	84	72.38
			5	76	66.29
			5	80	68.38
			5	76	65.71
			25	84	73.14
			25	88	76
			25	72	62.29
			25	76	66.29
	Pgr	dH₂O (null)	0	88	75.62
			0	96	81.9
			0	88	75.43
			0	84	71.62
		Fe-HBED	5	80	69.52
			5	76	65.52
			5	84	73.9
			5	80	68.76
			25	80	70.1
			25	72	62.67
			25	80	69.38
			25	84	73.14
		FeCl₃	5	72	60.38
			5	68	54.48
			5	84	68.95
			5	76	62.1
			25	72	60.19
			25	64	52.57
			25	80	64.57
			25	68	55.24
	Rac	dH₂O (null)	0	72	64.19
			0	80	69.9
			0	80	64.57
			0	84	70.86
		Fe-HBED	5	68	59.62
			5	76	63.43
			5	68	56
			5	72	60
			25	68	56.95
			25	64	51.81
			25	76	63.43
			25	68	57.14
		FeCl₃	5	92	81.14
			5	76	68.19
			5	80	68.38
			5	80	68
			25	80	66.29
			25	72	61.14
			25	68	58.1
			25	80	65.52
	Sge	dH₂O (null)	0	72	56.57
			0	80	61.33
			0	76	58.1
			0	80	63.24
		Fe-HBED	5	80	60.76
			5	68	53.9
			5	76	60
			5	80	61.71
			25	56	48.19
			25	52	43.62
			25	64	54.29
			25	56	47.24
		FeCl₃	5	72	60.76
			5	80	66.29
			5	64	54.1
			5	68	56
			25	56	46.1
			25	48	40.19
			25	60	48.76
			25	56	43.81
	Tse	dH₂O (null)	0	52	48.2
			0	68	62.4
			0	60	56
			0	64	58
		Fe-HBED	5	64	61.4
			5	72	66.4
			5	64	59.8
			5	60	55.6
			25	76	68.2
			25	60	57
			25	64	60.2
			25	64	59.8
		FeCl₃	5	52	49.6
			5	68	62.6
			5	64	60.2
			5	68	61.8
			25	64	62.4
			25	56	53
			25	68	61.8
			25	60	57.2
	Vth	dH₂O (null)	0	96	83.43
			0	100	87.81
			0	92	79.43
			0	96	82.86
		Fe-HBED	5	96	84.95
			5	88	77.14
			5	96	83.81
			5	92	81.33
			25	88	78.29
			25	92	80.76
			25	88	76.95
			25	80	72
		FeCl₃	5	92	80.76
			5	92	81.52
			5	96	84.95
			5	96	83.62
			25	88	75.24
			25	84	71.81
			25	80	68.76
			25	88	76.57
	Vte	dH₂O (null)	0	88	64.19
			0	92	66.86
			0	92	66.48
			0	84	62.67
		Fe-HBED	5	92	67.62
			5	84	61.14
			5	96	66.86
			5	88	63.05
			25	92	68.38
			25	80	59.05
			25	84	61.71
			25	88	64
		FeCl₃	5	88	64.19
			5	92	67.62
			5	84	61.33
			5	88	64.57
			25	80	57.71
			25	76	54.67
			25	84	60.57
			25	76	55.24

## Sheet: D3. Manganese
	Dataset 3. Raw data from Experiment 3 (Effects of manganese on ability of seeds to complete germination). The abbreviations for the studied species follows the article (see Table 1 for details).
	Species	Mn-containing compound	Concentration [µmol · dm¯³]	FGP [%]	IGV [a.u.]
	Amo	dH₂O (null)	0	60	55.81
			0	52	48.19
			0	64	58.67
			0	48	44.19
		Mn-HBED	5	60	55.81
			5	68	62.29
			5	56	51.43
			5	64	59.05
			25	48	44.95
			25	44	41.33
			25	52	48.19
			25	44	40.57
		MnCl₂	5	68	62.86
			5	64	58.86
			5	56	51.24
			5	64	59.43
			25	44	40.38
			25	36	32.95
			25	48	43.43
			25	36	32.95
	Aam	dH₂O (null)	0	64	47.81
			0	60	44.57
			0	60	44.93
			0	72	54.29
		Mn-HBED	5	52	38.48
			5	52	40.19
			5	44	33.9
			5	44	33.71
			25	48	34.86
			25	44	34.1
			25	44	34.1
			25	56	41.71
		MnCl₂	5	44	30.1
			5	48	35.05
			5	40	28.57
			5	36	26.86
			25	44	29.33
			25	28	19.24
			25	44	31.24
			25	36	25.33
	Bof	dH₂O (null)	0	56	37.52
			0	52	36
			0	44	30.1
			0	52	34.1
		Mn-HBED	5	52	36.76
			5	52	37.52
			5	48	33.71
			5	44	31.05
			25	48	33.14
			25	56	37.71
			25	44	29.52
			25	48	33.14
		MnCl₂	5	36	25.14
			5	44	30.48
			5	36	24.38
			5	40	27.05
			25	40	28
			25	32	22.29
			25	32	21.52
			25	44	29.71
	Csc	dH₂O (null)	0	52	47.05
			0	40	36.57
			0	36	32.95
			0	44	39.62
		Mn-HBED	5	28	24.76
			5	32	27.81
			5	20	16.76
			5	28	24.38
			25	20	17.71
			25	16	13.71
			25	24	20.38
			25	16	13.52
		MnCl₂	5	24	20.38
			5	28	24.57
			5	24	20.57
			5	16	13.9
			25	12	10.86
			25	8	6.29
			25	20	17.52
			25	12	9.52
	Cst	dH₂O (null)	0	100	97.71
			0	96	94.1
			0	100	97.52
			0	100	98.48
		Mn-HBED	5	96	93.71
			5	96	93.71
			5	100	97.33
			5	100	98.1
			25	96	93.71
			25	96	93.52
			25	100	97.52
			25	100	97.14
		MnCl₂	5	96	93.71
			5	96	94.67
			5	96	93.71
			5	100	97.71
			25	92	89.14
			25	100	96.57
			25	100	96.95
			25	92	89.71
	Dca	dH₂O (null)	0	92	84.95
			0	100	91.24
			0	96	87.81
			0	96	88.95
		Mn-HBED	5	96	87.43
			5	96	88.19
			5	100	90.67
			5	88	80.19
			25	92	84.19
			25	96	86.1
			25	88	80.76
			25	92	83.24
		MnCl₂	5	88	82.1
			5	100	92.19
			5	96	87.43
			5	92	84
			25	92	84.95
			25	100	90.1
			25	96	86.86
			25	92	85.52
	Dde	dH₂O (null)	0	72	66.67
			0	60	54.86
			0	64	58.29
			0	64	58.86
		Mn-HBED	5	48	42.48
			5	40	35.24
			5	52	45.14
			5	44	37.14
			25	48	43.62
			25	56	49.52
			25	48	42.48
			25	48	42.1
		MnCl₂	5	76	69.33
			5	68	62.67
			5	60	54.29
			5	64	57.52
			25	80	71.62
			25	60	53.14
			25	64	55.81
			25	64	56.95
	Evu	dH₂O (null)	0	60	55.24
			0	72	64
			0	64	57.33
			0	64	56.57
		Mn-HBED	5	48	44.57
			5	56	49.71
			5	56	51.43
			5	52	46.48
			25	56	50.86
			25	44	39.62
			25	44	39.43
			25	56	49.33
		MnCl₂	5	56	51.62
			5	60	53.52
			5	44	40.19
			5	48	43.24
			25	56	51.24
			25	56	50.1
			25	44	39.24
			25	60	52.76
	Gcr	dH₂O (null)	0	88	29.52
			0	76	26.48
			0	84	26.86
			0	84	28.57
		Mn-HBED	5	80	24.76
			5	92	28
			5	76	24.76
			5	80	25.33
			25	72	22.86
			25	72	22.29
			25	64	21.71
			25	76	23.24
		MnCl₂	5	80	23.81
			5	84	26.29
			5	68	22.67
			5	88	26.86
			25	84	25.33
			25	88	27.24
			25	72	22.86
			25	80	25.91
	Hpi	dH₂O (null)	0	92	81.91
			0	100	89.9
			0	96	85.71
			0	96	84.95
		Mn-HBED	5	88	79.24
			5	96	87.05
			5	84	75.62
			5	92	83.05
			25	88	80
			25	100	88.57
			25	88	78.48
			25	92	82.1
		MnCl₂	5	84	76.76
			5	96	84.95
			5	96	84.38
			5	88	76.67
			25	96	86.67
			25	84	76.57
			25	88	79.43
			25	88	79.81
	Hpe	dH₂O (null)	0	64	43.43
			0	76	50.48
			0	72	48.19
			0	72	49.14
		Mn-HBED	5	52	31.43
			5	68	40.19
			5	56	32.76
			5	56	34.1
			25	56	30.86
			25	52	28.57
			25	60	32.95
			25	52	29.14
		MnCl₂	5	56	34.67
			5	52	32.76
			5	56	35.24
			5	64	40.57
			25	60	37.33
			25	52	32.57
			25	52	32.38
			25	56	35.81
	Hra	dH₂O (null)	0	56	52
			0	52	47.6
			0	60	55.2
			0	56	51
		Mn-HBED	5	48	44
			5	52	48.6
			5	44	41.2
			5	52	47
			25	44	41.6
			25	52	48.8
			25	44	41.2
			25	40	37.4
		MnCl₂	5	48	45
			5	48	45.6
			5	52	47.4
			5	44	41.2
			25	44	41.8
			25	40	37.6
			25	40	37
			25	44	41.2
	Pme	dH₂O (null)	0	76	66.48
			0	92	79.81
			0	88	76.95
			0	84	73.14
		Mn-HBED	5	68	57.52
			5	76	64
			5	64	54.67
			5	68	56.95
			25	72	61.14
			25	68	56.95
			25	68	57.71
			25	64	54.48
		MnCl₂	5	60	52.19
			5	60	52.76
			5	52	45.33
			5	52	45.33
			25	56	47.81
			25	56	46.67
			25	48	40.76
			25	60	49.9
	Pre	dH₂O (null)	0	76	65.14
			0	88	75.43
			0	80	68.38
			0	80	68.38
		Mn-HBED	5	68	59.05
			5	76	64.57
			5	72	62.67
			5	76	64.57
			25	72	62.67
			25	80	69.71
			25	68	58.67
			25	68	59.05
		MnCl₂	5	72	62.67
			5	76	65.14
			5	72	62.86
			5	76	64.95
			25	76	64.95
			25	68	58.86
			25	80	66.67
			25	72	61.71
	Pgr	dH₂O (null)	0	96	83.24
			0	100	86.1
			0	96	84.57
			0	96	83.43
		Mn-HBED	5	88	75.62
			5	80	69.9
			5	92	79.81
			5	92	78.67
			25	88	76.95
			25	92	80.19
			25	80	69.33
			25	80	68.95
		MnCl₂	5	88	78.1
			5	100	87.62
			5	88	78.29
			5	92	81.33
			25	88	77.9
			25	92	81.33
			25	84	73.9
			25	84	73.52
	Rac	dH₂O (null)	0	80	69.14
			0	88	76.38
			0	84	72.57
			0	80	67.62
		Mn-HBED	5	76	64
			5	80	68.19
			5	88	75.62
			5	84	69.71
			25	88	77.52
			25	80	70.48
			25	80	67.81
			25	84	74.1
		MnCl₂	5	76	65.9
			5	88	74.86
			5	76	67.81
			5	88	74.29
			25	56	49.52
			25	68	59.62
			25	52	46.67
			25	60	53.71
	Sge	dH₂O (null)	0	76	65.14
			0	80	68.38
			0	72	61.9
			0	72	61.33
		Mn-HBED	5	64	55.04
			5	52	45.33
			5	72	61.71
			5	68	58.29
			25	68	59.81
			25	60	52.76
			25	60	52.95
			25	68	58.67
		MnCl₂	5	60	52.38
			5	68	59.05
			5	56	48.57
			5	64	55.24
			25	60	52.95
			25	60	51.24
			25	52	45.14
			25	64	55.62
	Tse	dH₂O (null)	0	80	75.24
			0	60	56
			0	64	60.57
			0	64	60.19
		Mn-HBED	5	64	57.9
			5	72	67.62
			5	64	59.62
			5	64	60
			25	68	63.43
			25	68	63.24
			25	56	51.81
			25	60	56.38
		MnCl₂	5	76	70.1
			5	76	71.62
			5	64	59.43
			5	64	59.81
			25	68	63.81
			25	72	67.62
			25	60	56.57
			25	68	63.62
	Vth	dH₂O (null)	0	92	76.76
			0	100	85.9
			0	100	84.19
			0	92	78.67
		Mn-HBED	5	92	78.1
			5	100	85.9
			5	88	76.19
			5	92	80.19
			25	88	75.43
			25	96	81.9
			25	80	68.76
			25	96	80.38
		MnCl₂	5	88	77.33
			5	100	87.24
			5	92	80.38
			5	88	75.05
			25	88	76.38
			25	100	86.29
			25	100	85.33
			25	84	72.95
	Vte	dH₂O (null)	0	92	67.62
			0	100	74.29
			0	92	66.67
			0	96	68.76
		Mn-HBED	5	92	67.62
			5	96	70.29
			5	88	62.86
			5	88	64.57
			25	92	67.62
			25	92	67.05
			25	100	73.71
			25	88	64
		MnCl₂	5	88	65.9
			5	100	72.95
			5	84	60.95
			5	88	64.57
			25	92	68.38
			25	88	64.95
			25	96	69.71
			25	88	64.95

## Sheet: D4. Aluminum
	Dataset 4. Raw data from Experiment 4 (Effects of aluminum on ability of seeds to complete germination). The abbreviations for the studied species follows the article (see Table 1 for details).
	Species	Concentration [mmol · dm¯³]	FGP [%]	IGV [a.u.]
	Amo	0	60	57.14
		0	76	71.43
		0	64	58.81
		0	64	59.24
		0.01	84	78.48
		0.01	68	62.57
		0.01	72	65.9
		0.01	72	66.67
		0.1	76	70.86
		0.1	72	65.33
		0.1	68	63.43
		0.1	76	68.76
		1	80	75.05
		1	76	69.52
		1	76	71.43
		1	72	66.29
		10	76	69.33
		10	80	71.43
		10	80	72.57
		10	68	61.14
	Aam	0	76	54.29
		0	80	59.05
		0	72	53.14
		0	80	60
		0.01	76	58.1
		0.01	80	61.33
		0.01	64	49.52
		0.01	76	57.33
		0.1	48	37.71
		0.1	52	40.19
		0.1	40	29.71
		0.1	52	39.81
		1	56	38.67
		1	40	28.19
		1	52	37.33
		1	48	34.47
		10	52	35.62
		10	40	27.62
		10	40	28.38
		10	56	37.9
	Bof	0	60	38.29
		0	64	43.43
		0	56	37.14
		0	56	40
		0.01	40	27.24
		0.01	60	41.52
		0.01	52	35.05
		0.01	52	35.62
		0.1	52	31.05
		0.1	60	35.62
		0.1	52	31.43
		0.1	52	31.81
		1	28	17.9
		1	32	20.38
		1	20	12.38
		1	28	19.43
		10	8	4.95
		10	0	0
		10	4	1.9
		10	12	6.1
	Csc	0	40	36.76
		0	44	40.57
		0	48	43.05
		0	40	35.62
		0.01	36	32.95
		0.01	48	42.67
		0.01	44	40
		0.01	40	36
		0.1	40	36.76
		0.1	40	36
		0.1	48	43.81
		0.1	48	42.48
		1	52	48.95
		1	48	44.19
		1	52	48.76
		1	44	40.95
		10	68	62.48
		10	60	55.62
		10	52	47.05
		10	56	52.76
	Cst	0	96	93.9
		0	100	98.1
		0	100	97.52
		0	100	97.9
		0.01	96	93.9
		0.01	100	98.1
		0.01	96	94.1
		0.01	100	97.71
		0.1	96	94.29
		0.1	96	94.67
		0.1	96	94.29
		0.1	100	97.71
		1	96	95.05
		1	100	97.9
		1	96	94.29
		1	96	94.29
		10	96	94.1
		10	92	89.71
		10	96	93.71
		10	100	98.1
	Dca	0	92	87.24
		0	96	90.48
		0	100	94.86
		0	92	87.62
		0.01	92	86.67
		0.01	100	93.71
		0.01	88	82.48
		0.01	92	87.24
		0.1	88	82.48
		0.1	96	90.1
		0.1	88	82.48
		0.1	88	83.05
		1	96	90.1
		1	88	82.29
		1	92	86.1
		1	92	87.24
		10	80	75.62
		10	96	90.48
		10	76	71.43
		10	88	82.48
	Dde	0	80	74.29
		0	64	59.43
		0	64	59.05
		0	68	63.43
		0.01	80	72.38
		0.01	68	60.38
		0.01	76	69.33
		0.01	72	66.48
		0.1	56	51.05
		0.1	64	59.24
		0.1	52	47.81
		0.1	56	51.62
		1	60	55.05
		1	60	54.48
		1	64	58.48
		1	52	46.67
		10	44	40.38
		10	32	29.14
		10	40	35.05
		10	36	32.38
	Evu	0	60	49.52
		0	56	47.43
		0	64	54.86
		0	60	51.05
		0.01	60	49.9
		0.01	56	48.19
		0.01	56	48.95
		0.01	52	44.57
		0.1	52	44.76
		0.1	68	58.29
		0.1	52	44.38
		0.1	56	47.05
		1	68	60.76
		1	68	60
		1	56	50.1
		1	68	59.24
		10	52	45.9
		10	40	35.62
		10	48	43.24
		10	52	46.67
	Gcr	0	100	46.29
		0	88	41.71
		0	92	42.86
		0	96	44.95
		0.01	96	44.76
		0.01	96	44.95
		0.01	84	40.38
		0.01	92	44.38
		0.1	96	44.38
		0.1	100	47.05
		0.1	84	39.24
		0.1	88	41.33
		1	84	31.81
		1	72	28.57
		1	88	35.81
		1	84	32.76
		10	84	30.29
		10	72	25.5
		10	80	31.05
		10	76	26.29
	Hpi	0	92	86.86
		0	100	94.48
		0	88	81.71
		0	92	86.86
		0.01	96	91.24
		0.01	100	94.86
		0.01	84	78.86
		0.01	92	86.1
		0.1	80	76
		0.1	72	67.81
		0.1	84	78.86
		0.1	80	75.43
		1	84	78.86
		1	88	81.71
		1	72	66.86
		1	80	75.43
		10	76	71.43
		10	80	75.05
		10	68	63.43
		10	76	70.29
	Hpe	0	64	39.24
		0	56	37.71
		0	60	38.86
		0	60	37.14
		0.01	92	66.48
		0.01	76	57.33
		0.01	88	64.57
		0.01	80	60.57
		0.1	72	42.48
		0.1	76	45.9
		0.1	68	44
		0.1	68	43.81
		1	36	19.62
		1	44	26.67
		1	32	19.24
		1	32	19.62
		10	40	20.95
		10	28	16.57
		10	44	26.1
		10	28	16
	Hra	0	52	46.86
		0	56	52.38
		0	44	39.62
		0	48	44.19
		0.01	48	42.48
		0.01	32	28.95
		0.01	44	39.81
		0.01	36	32.76
		0.1	44	39.24
		0.1	40	35.81
		0.1	36	32
		0.1	36	31.61
		1	52	43.24
		1	40	34.67
		1	32	28
		1	40	35.24
		10	40	33.71
		10	28	24.95
		10	28	24.57
		10	40	35.05
	Pme	0	80	65.9
		0	76	64.76
		0	76	64
		0	80	66.67
		0.01	72	61.33
		0.01	68	57.14
		0.01	76	64
		0.01	68	59.05
		0.1	60	51.62
		0.1	68	58.48
		0.1	56	48
		0.1	56	48
		1	60	49.33
		1	56	46.48
		1	60	49.71
		1	64	52.19
		10	56	45.9
		10	48	40
		10	52	44.19
		10	48	40.57
	Pre	0	92	80.19
		0	96	85.14
		0	88	76.76
		0	92	81.33
		0.01	96	82.86
		0.01	92	80.57
		0.01	92	80.19
		0.01	96	83.62
		0.1	88	78.29
		0.1	76	67.05
		0.1	88	78.1
		0.1	84	74.1
		1	60	53.9
		1	64	57.14
		1	52	46.86
		1	64	57.52
		10	40	33.71
		10	32	26.67
		10	40	32.95
		10	44	36.95
	Pgr	0	96	84.28
		0	100	88
		0	96	84
		0	96	86.67
		0.01	84	75.43
		0.01	80	71.62
		0.01	92	82.67
		0.01	84	75.62
		0.1	88	79.05
		0.1	88	78.48
		0.1	76	67.43
		0.1	88	77.33
		1	84	69.52
		1	80	68.19
		1	88	75.05
		1	76	63.05
		10	32	24.19
		10	32	25.9
		10	24	16.38
		10	36	25.52
	Rac	0	84	72.38
		0	88	73.14
		0	76	66.45
		0	80	69.14
		0.01	72	64
		0.01	72	64.57
		0.01	80	72.19
		0.01	80	70.86
		0.1	80	70.29
		0.1	72	62.29
		0.1	76	65.9
		0.1	76	67.43
		1	72	65.52
		1	64	56.95
		1	80	71.81
		1	76	67.62
		10	72	64.38
		10	64	55.81
		10	76	66.67
		10	84	72.95
	Sge	0	72	57.14
		0	80	65.9
		0	68	54.86
		0	68	56.19
		0.01	44	38.48
		0.01	40	34.86
		0.01	48	41.52
		0.01	36	29.9
		0.1	40	34.48
		0.1	48	41.9
		0.1	48	41.14
		0.1	40	34.48
		1	44	38.86
		1	32	27.43
		1	40	34.67
		1	36	30.86
		10	20	16
		10	12	8.95
		10	12	8.76
		10	28	22.67
	Tse	0	80	76.57
		0	68	64.38
		0	68	65.14
		0	72	68.19
		0.01	72	68.95
		0.01	76	71.81
		0.01	64	60.19
		0.01	68	63.81
		0.1	72	68.76
		0.1	68	63.24
		0.1	68	64.38
		0.1	84	80
		1	92	86.67
		1	76	72.19
		1	76	70.86
		1	80	75.05
		10	88	82.86
		10	80	75.43
		10	72	67.24
		10	76	72.38
	Vth	0	92	83.43
		0	88	79.43
		0	100	90.1
		0	96	86.48
		0.01	92	83.81
		0.01	100	89.71
		0.01	88	79.05
		0.01	100	90.48
		0.1	92	82.29
		0.1	80	71.24
		0.1	100	88.57
		0.1	92	81.33
		1	100	89.52
		1	80	71.24
		1	88	78.48
		1	92	81.71
		10	84	75.24
		10	72	64
		10	88	78.1
		10	84	74.48
	Vte	0	92	68.76
		0	100	76
		0	100	74.67
		0	88	66.1
		0.01	100	75.62
		0.01	92	69.52
		0.01	88	66.29
		0.01	100	75.81
		0.1	96	74.48
		0.1	88	67.05
		0.1	100	76
		0.1	92	70.67
		1	100	71.62
		1	96	68.19
		1	92	65.71
		1	100	71.24
		10	80	48
		10	84	52.57
		10	72	44.57
		10	80	48
