# Supplementary material for: Acidity and availability of aluminum, iron and manganese as factors affecting germination in European acidic dry and alkaline xerothermic grasslands
Source: PeerJ journal article supplement (doi:10.7717/peerj.13255), 2022-04-28
Supplement: Supplemental_Figure_S1.pdf [file Supplemental_Figure_S1.pdf]

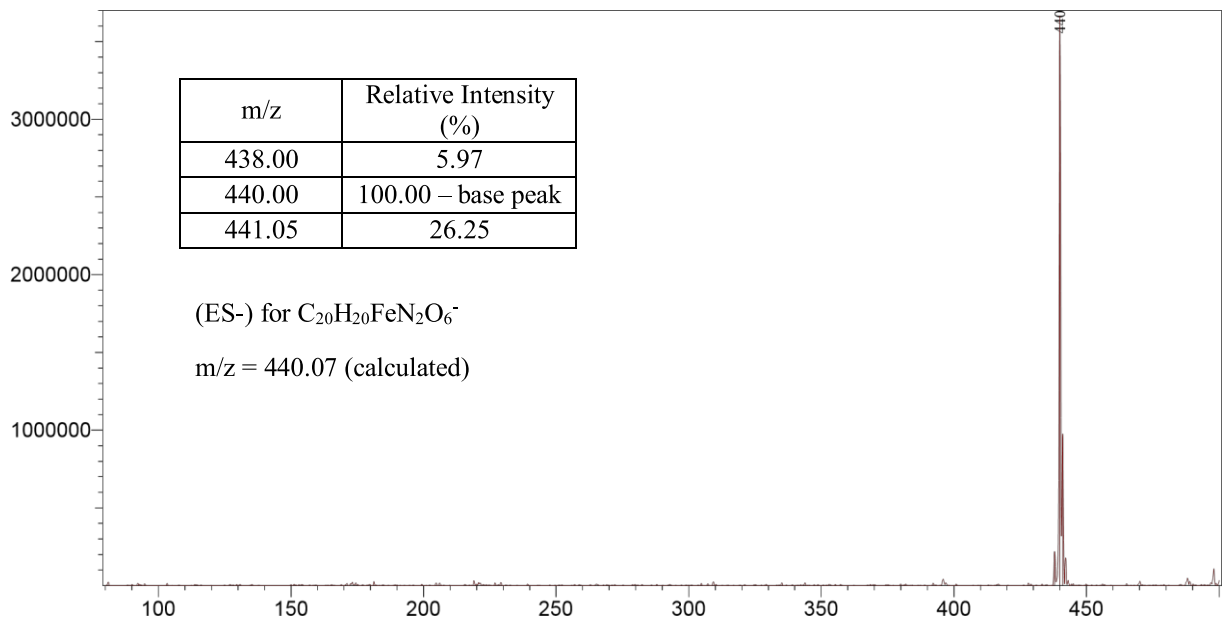

**A.** LC-MS/MS spectrum (ES-) of *N,N'*-di(2-hydroxybenzyl)ethylenediamine-*N,N'*-diacetic acid iron(III) sodium salt, Fe-HBED.

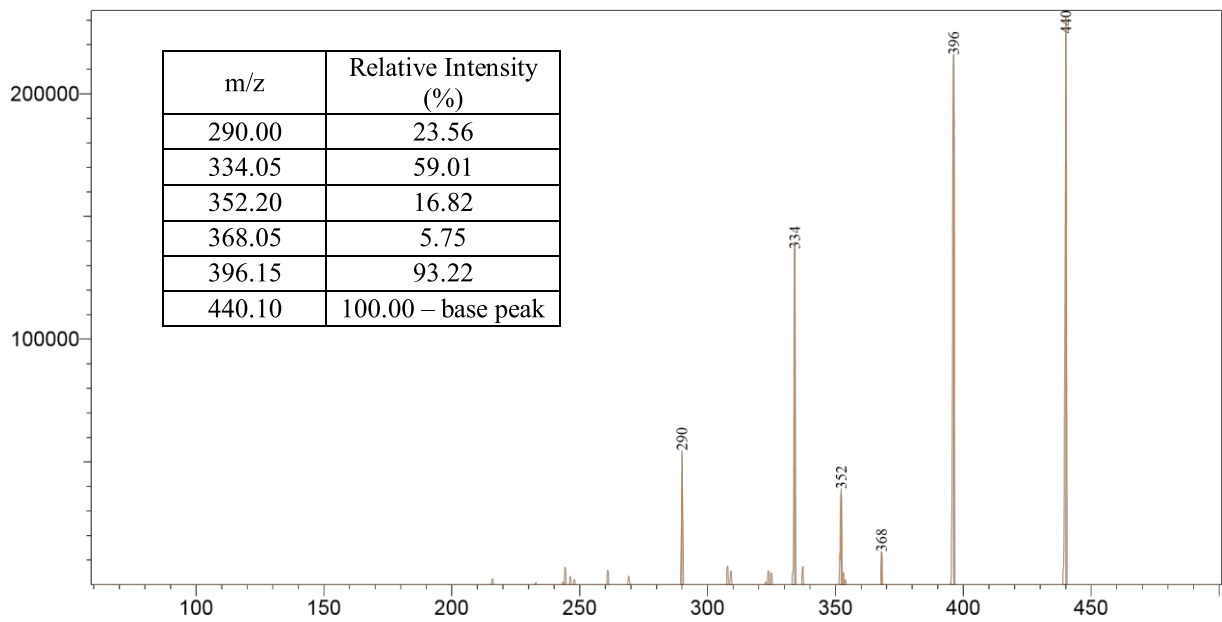

**B.** LC-MS/MS spectrum (ES-) of *N,N'*-di(2-hydroxybenzyl)ethylenediamine-*N,N'*-diacetic acid iron(III) sodium salt, Fe-HBED – base peak ( $m/z$  440.10) fragmentation spectrum.

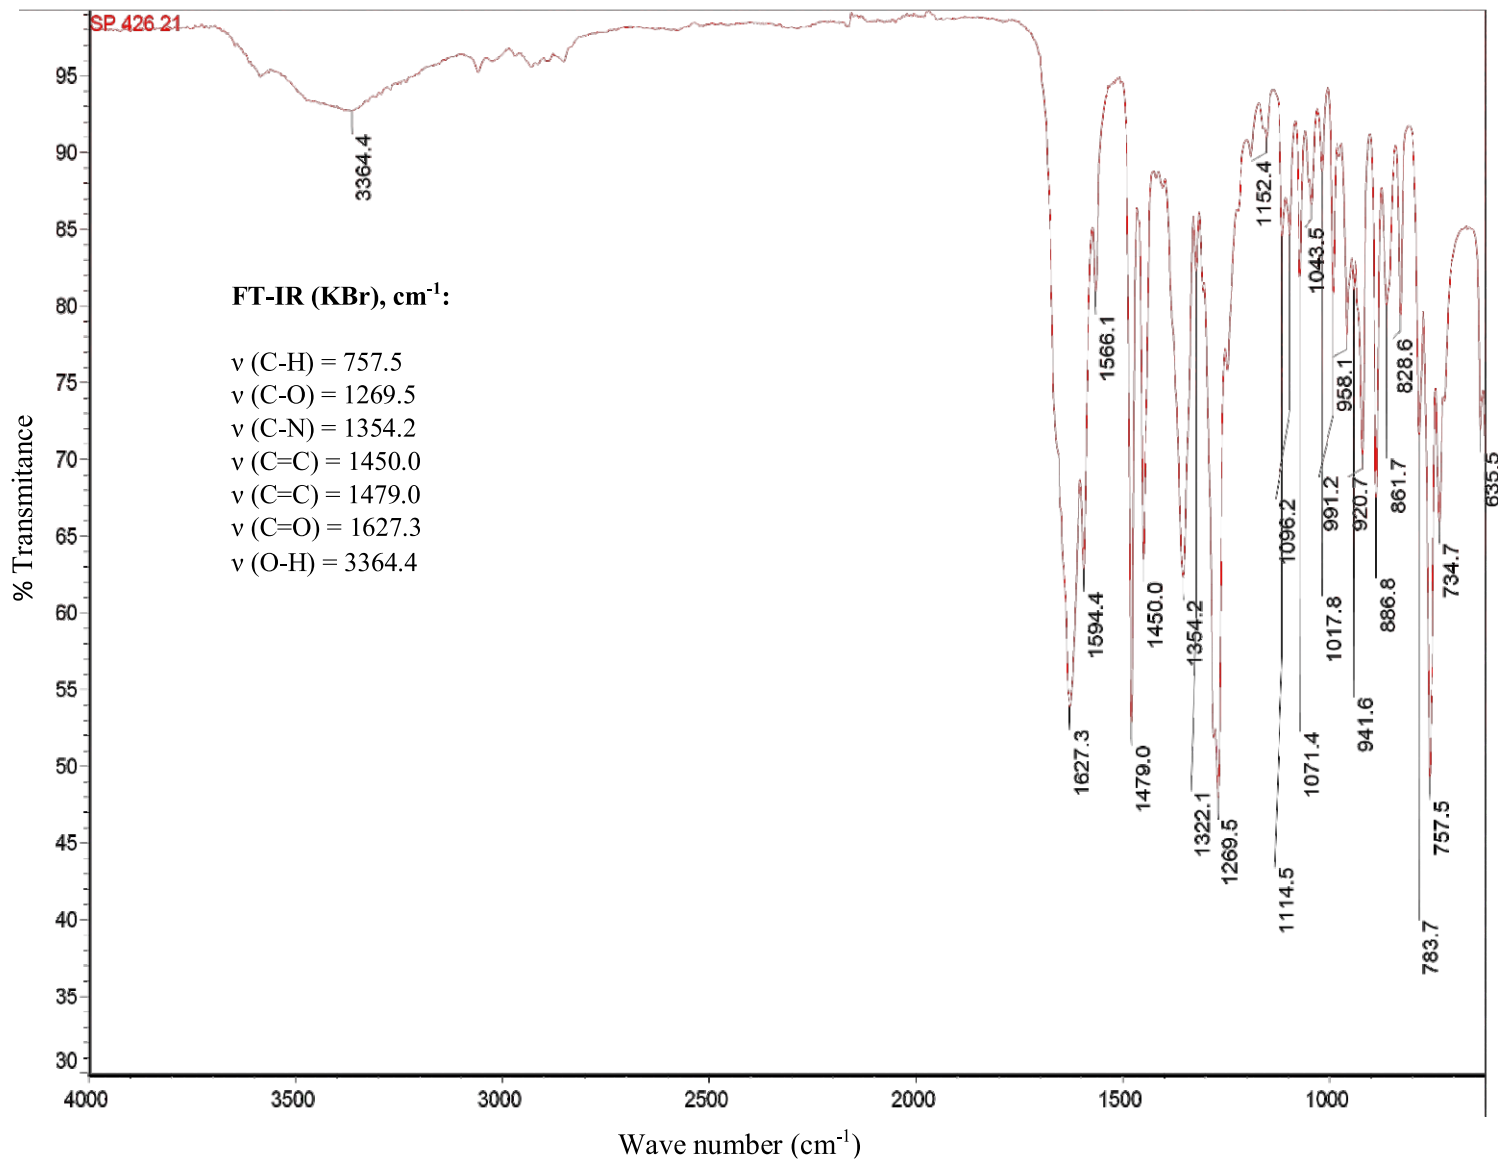

C. FT-IR spectrum of *N,N'*-di(2-hydroxybenzyl)ethylenediamine-*N,N'*-diacetic acid iron(III) sodium salt, Fe-HBED.

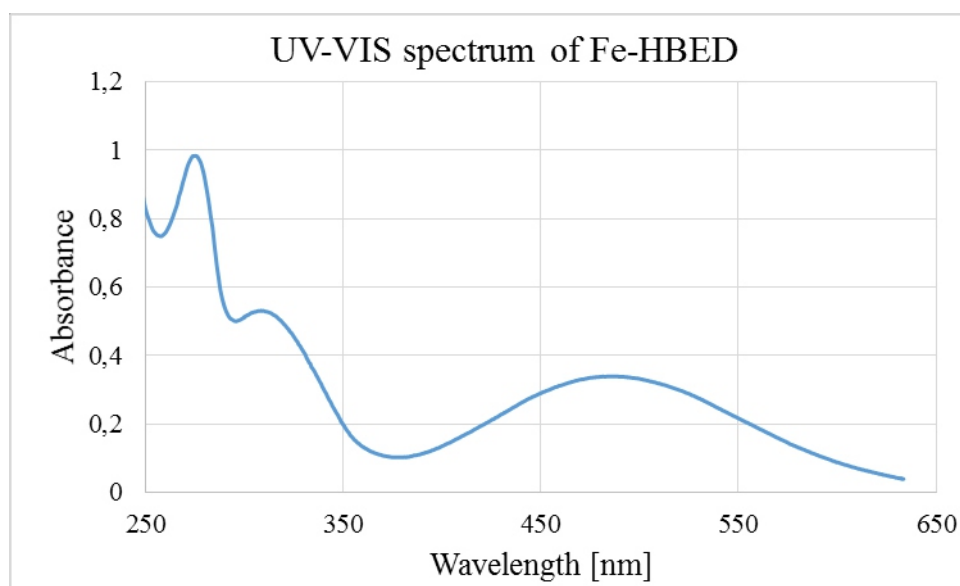

$$\lambda_{\max 1} = 274.0 \text{ nm}; \lambda_{\max 2} = 309.0 \text{ nm}; \lambda_{\max 3} = 491.5 \text{ nm};$$

$$\epsilon = 357.48 \text{ dm}^3 \cdot \text{mol}^{-1} \cdot \text{cm}^{-1}$$

D. UV-VIS spectrum of *N,N'*-di(2-hydroxybenzyl)ethylenediamine-*N,N'*-diacetic acid iron(III) sodium salt, Fe-HBED.

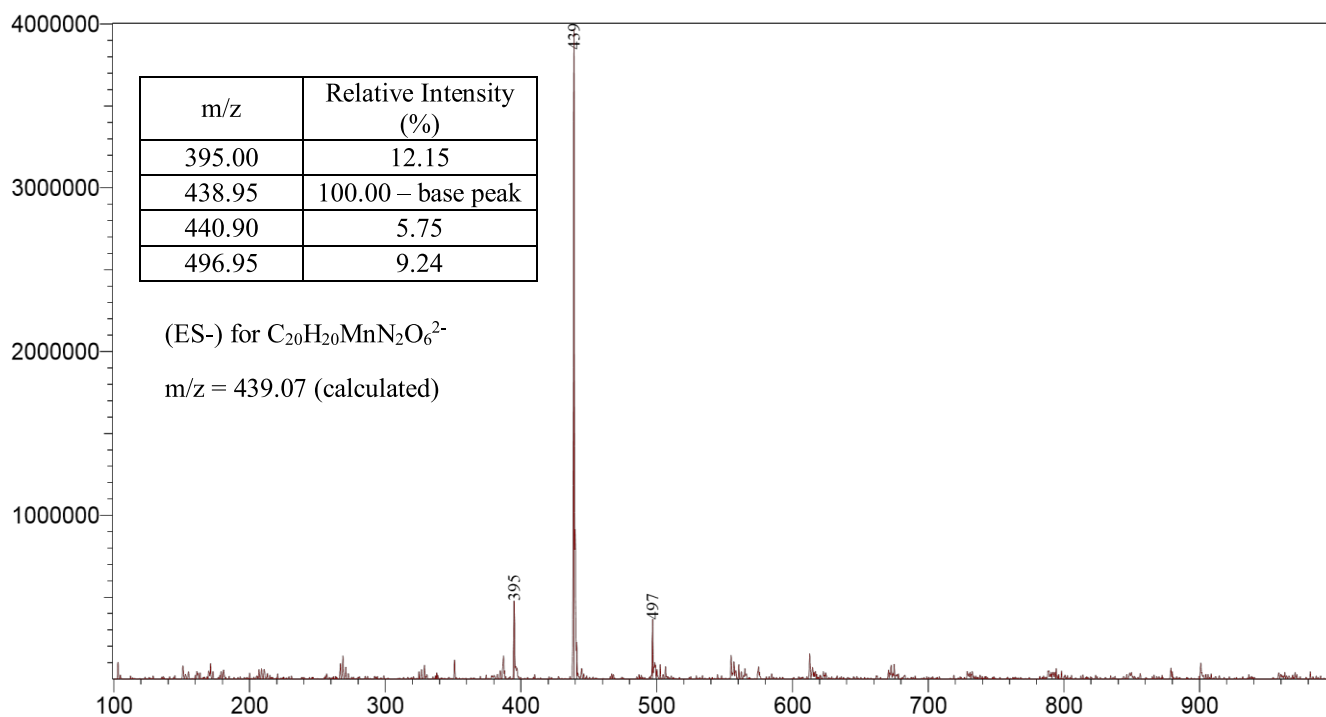

**E.** LC-MS/MS spectrum (ES-) of *N,N'*-di(2-hydroxybenzyl)ethylenediamine-*N,N'*-diacetic acid manganese(II) sodium salt, Mn-HBED.

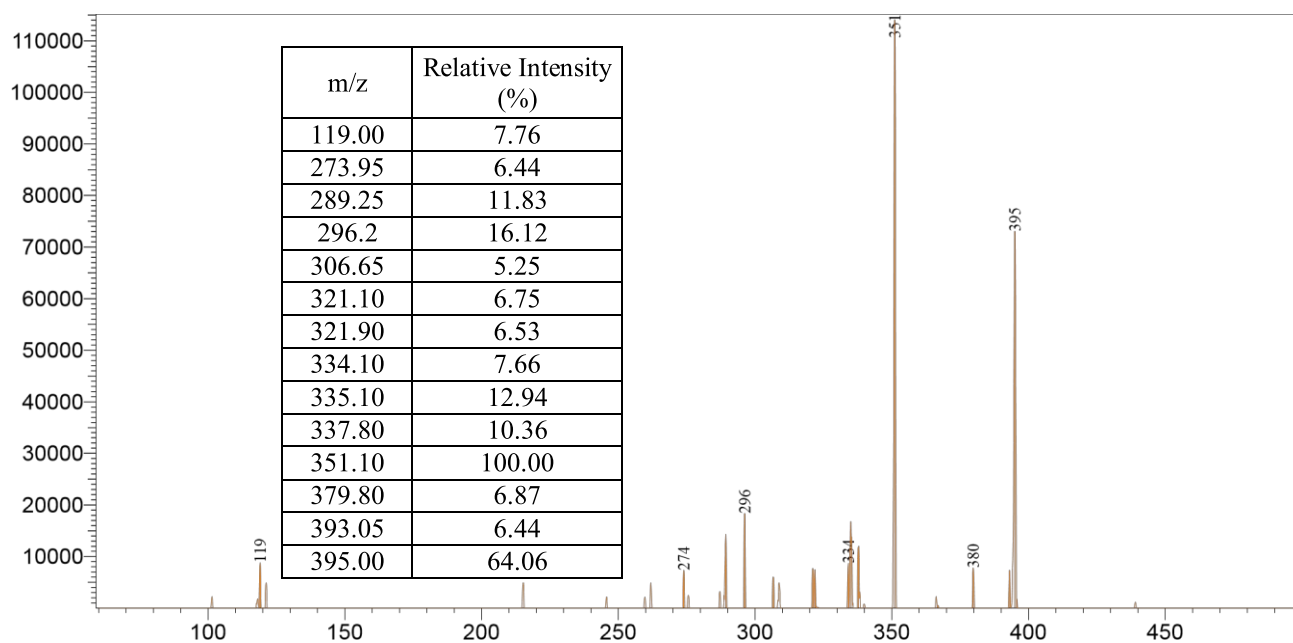

**F.** LC-MS/MS spectrum (ES-) of *N,N'*-di(2-hydroxybenzyl)ethylenediamine-*N,N'*-diacetic acid manganese(II) sodium salt, Mn-HBED – base peak ( $m/z$  438.95) fragmentation spectrum.

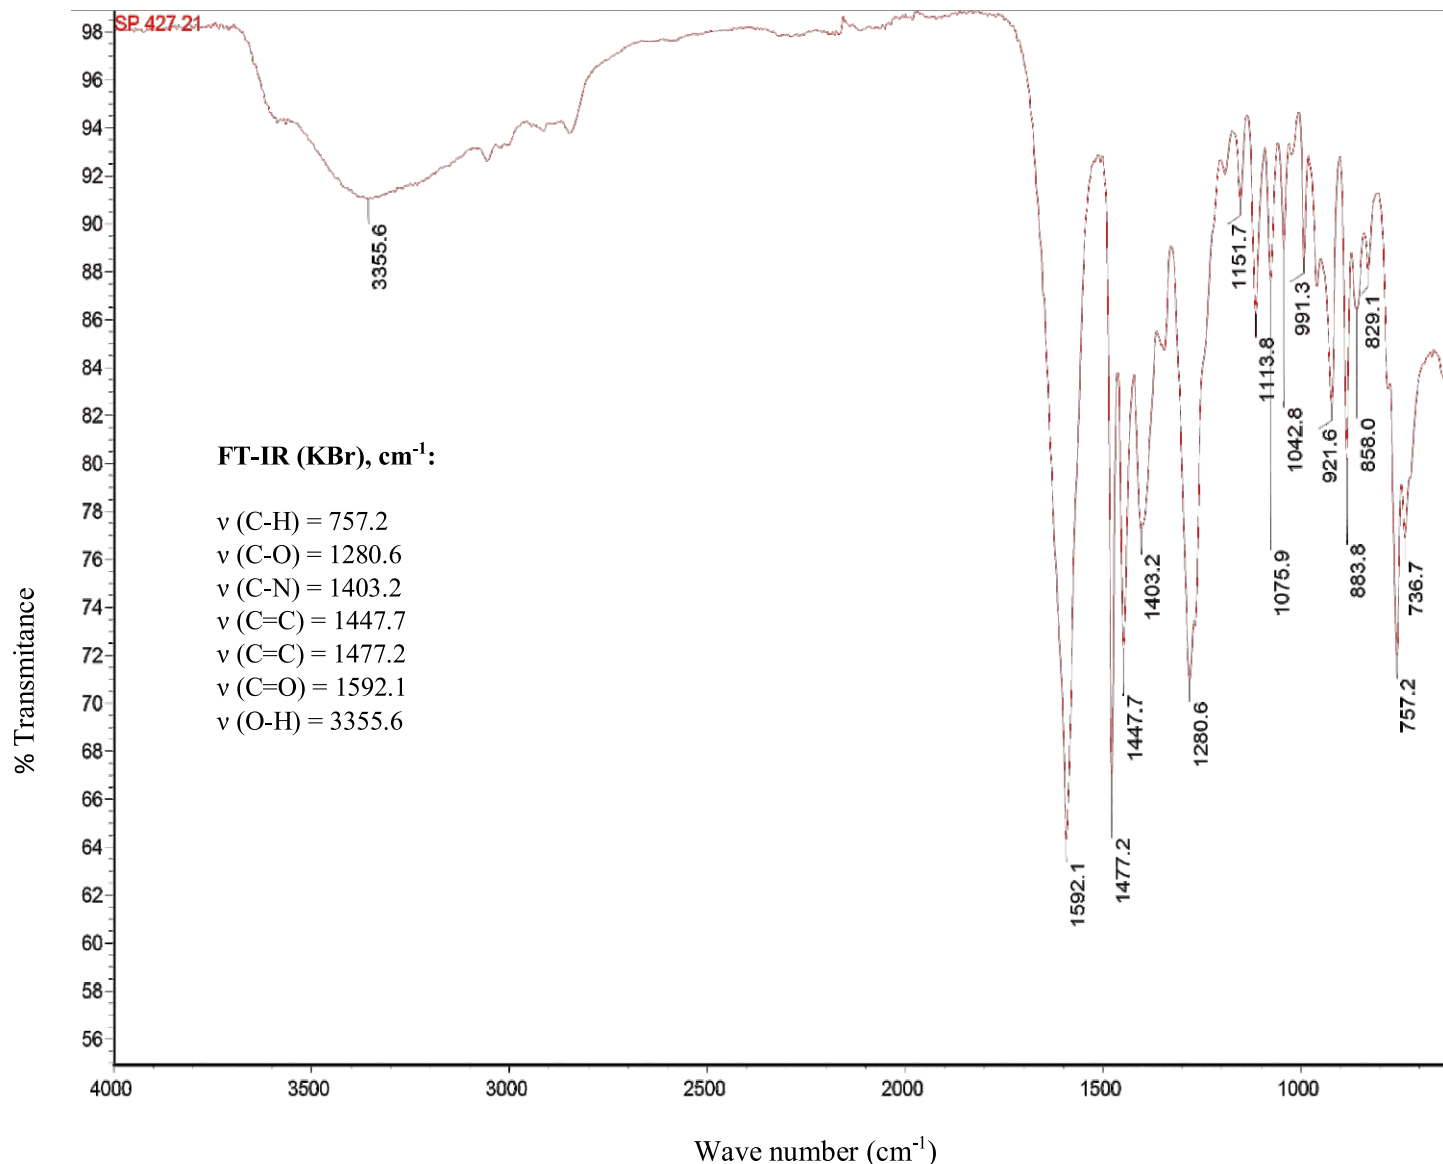

**G.** FT-IR spectrum of *N,N'*-di(2-hydroxybenzyl)ethylenediamine-*N,N'*-diacetic acid manganese(II) sodium salt, Mn-HBED.

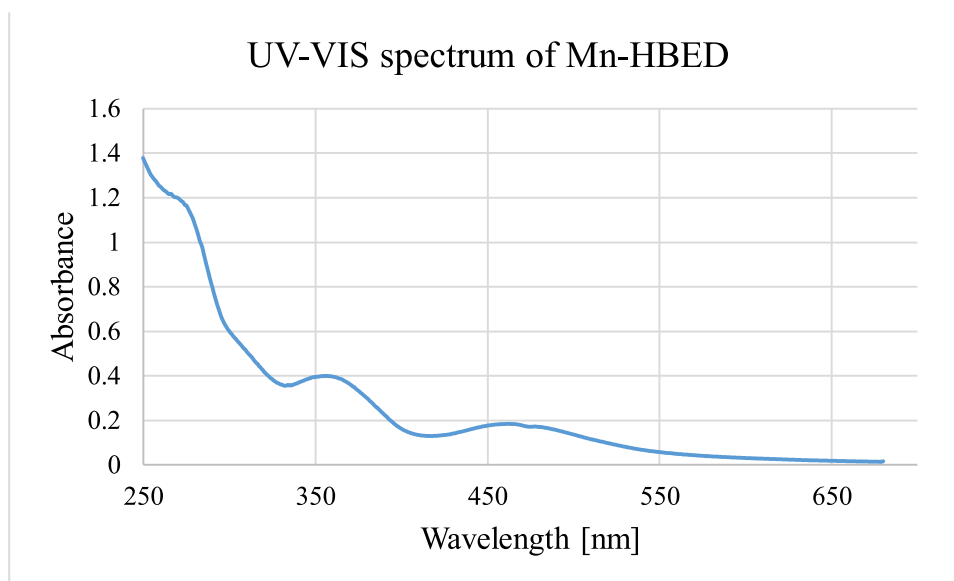

$$\lambda_{\text{max}1} = 269.0 \text{ nm}; \lambda_{\text{max}2} = 355.0 \text{ nm}; \lambda_{\text{max}3} = 463.5 \text{ nm};$$

$$\varepsilon = 675.01 \text{ dm}^3 \cdot \text{mol}^{-1} \cdot \text{cm}^{-1}$$

**H.** UV-VIS spectrum of *N,N'*-di(2-hydroxybenzyl)ethylenediamine-*N,N'*-diacetic acid manganese(II) sodium salt, Mn-HBED.

**Supplementary Figure S1.** LC-MS/MS spectra (A, B, E, F), FTIR spectra (C, G) and UV-VIS spectra (D, H) of Fe-HBED and Mn-HBED.
